# Supplementary material for: Chronic Occupational Mold Exposure Drives Expansion of Aspergillus-Reactive Type 1 and Type 2 T-Helper Cell Responses
Source: MDPI journal article supplement (doi:10.3390/jof7090698), 2021-08-27
Supplement: s1 [file jof-1321640-supplementary.pdf › jof-1321640-supplementary.pdf]

# Chronic occupational mold exposure drives expansion of *Aspergillus*-reactive type 1 and type 2 T-helper cell responses

## Supplementary Figures and Tables

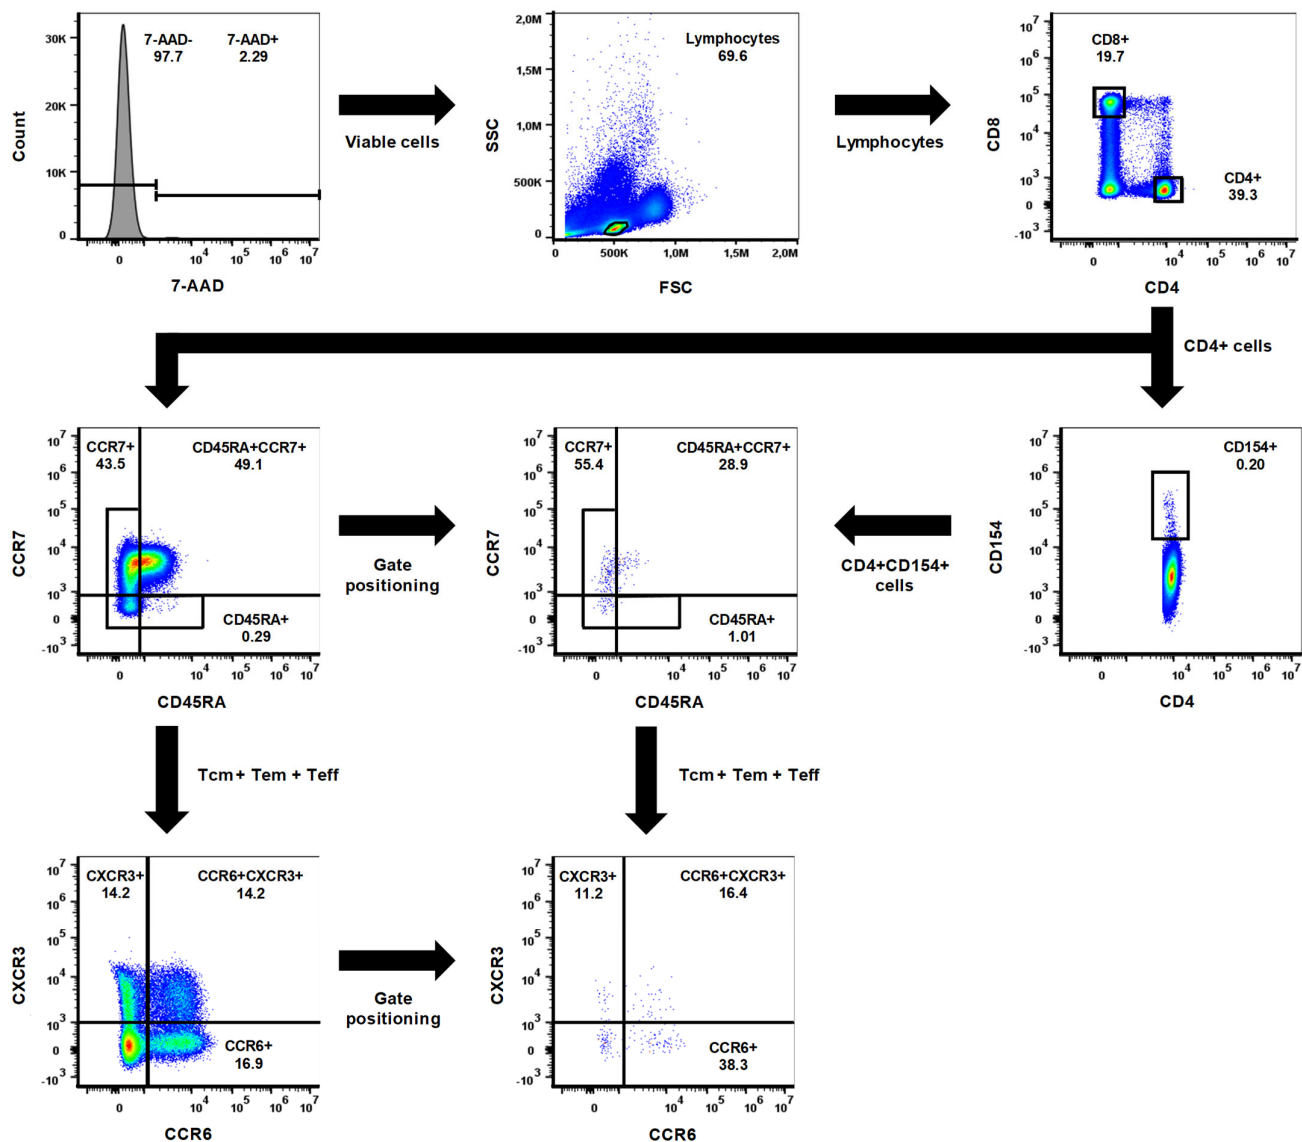

**Figure S1.** Gating strategy and representative data set for flow cytometric analyses. 7-Aminoactinomycin D (7-AAD)-positive (dead) cells were excluded, lymphocytes were identified by light scatter properties, and CD4<sup>+</sup> T-helper (Th) cells were gated. Effector Th cells (Teff; CD4<sup>+</sup>CD45RA<sup>+</sup>CCR7<sup>+</sup>), effector memory Th cells (Tem; CD4<sup>+</sup>CD45RA<sup>+</sup>CCR7<sup>+</sup>), central memory Th cells (Tcm; CD4<sup>+</sup>CD45RA<sup>+</sup>CCR7<sup>+</sup>), and naive Th cells (CD4<sup>+</sup>CD45RA<sup>+</sup>CCR7<sup>+</sup>) were differentiated among CD4<sup>+</sup> cells. An additional gate including the Tcm, Tem, and Teff subsets was positioned in order to exclude naive Th cells from subsequent Th1/Th2/Th17 cell differentiation. Thereafter, the non-naïve CD4<sup>+</sup> cells were subdivided into Th1 cells (CD4<sup>+</sup>CCR6<sup>+</sup>CXCR3<sup>+</sup>), Th2 cells (CD4<sup>+</sup>CCR6<sup>+</sup>CXCR3<sup>+</sup>), Th17 cells (CD4<sup>+</sup>CCR6<sup>+</sup>CXCR3<sup>+</sup>), and others including Th1/Th17-type cells (CD4<sup>+</sup>CCR6<sup>+</sup>CXCR3<sup>+</sup>). Antigen-reactive cells among the total CD4<sup>+</sup> Th population were identified by CD154 expression. The CD45RA/CCR7 and CCR6/CXCR3 gates were then transferred to the CD4<sup>+</sup>CD154<sup>+</sup> population in order to define

memory/effector phenotypes and polarization of the antigen-reactive Th cells. Abbreviations: CD = cluster of differentiation, CCR = C-C motive chemokine receptor, CXCR = C-X-C motive chemokine receptor.

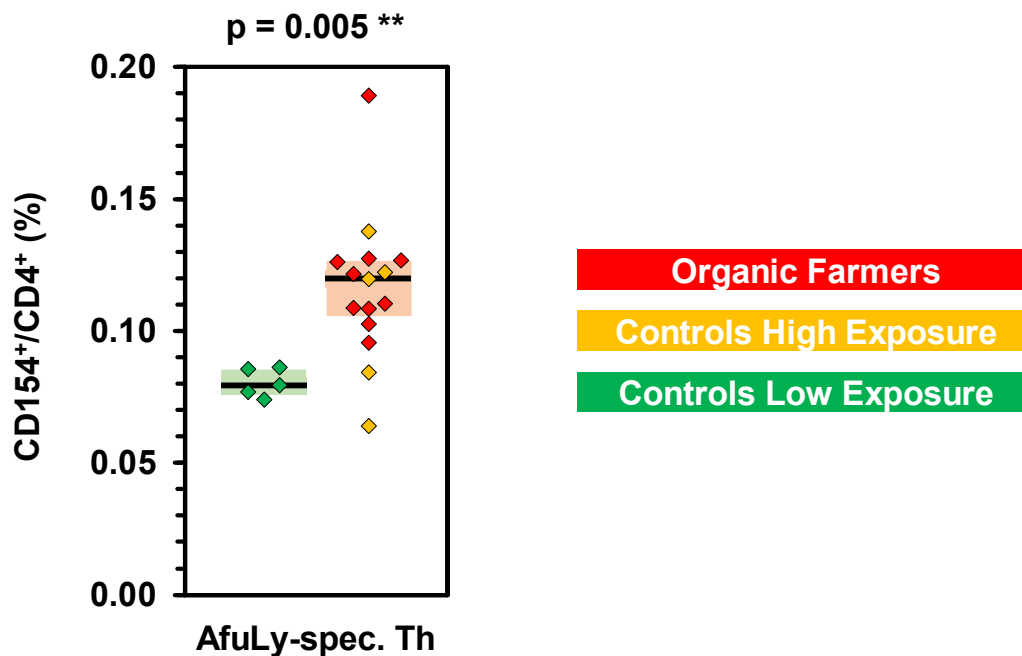

**Figure S2.** Subjects with risk factors for mold exposure in their occupational or residential environment display significantly increased *A. fumigatus*-specific T-helper cell frequencies. PBMCs from 10 organic farmers (red), 5 control subjects with high residential mold exposure (yellow), and 5 control subjects reporting no significant risk factors for occupational or residential exposure (green) were stimulated with *A. fumigatus* mycelial lysate (AfuLy). Frequencies of CD154<sup>+</sup> cells among (CD4<sup>+</sup>) T-helper cells were determined by flow cytometry. Unlike in Fig. 1a, subjects are grouped according to our previously reported classification of mold exposure profiles (Wurster et al., 2017, Mycoses; Page et al., 2018, Intern J Med Microbiol). Individual background-adjusted results, medians (black bars), and inter-quartile ranges (colored boxes) are shown. Two-sided Mann-Whitney-U-test.

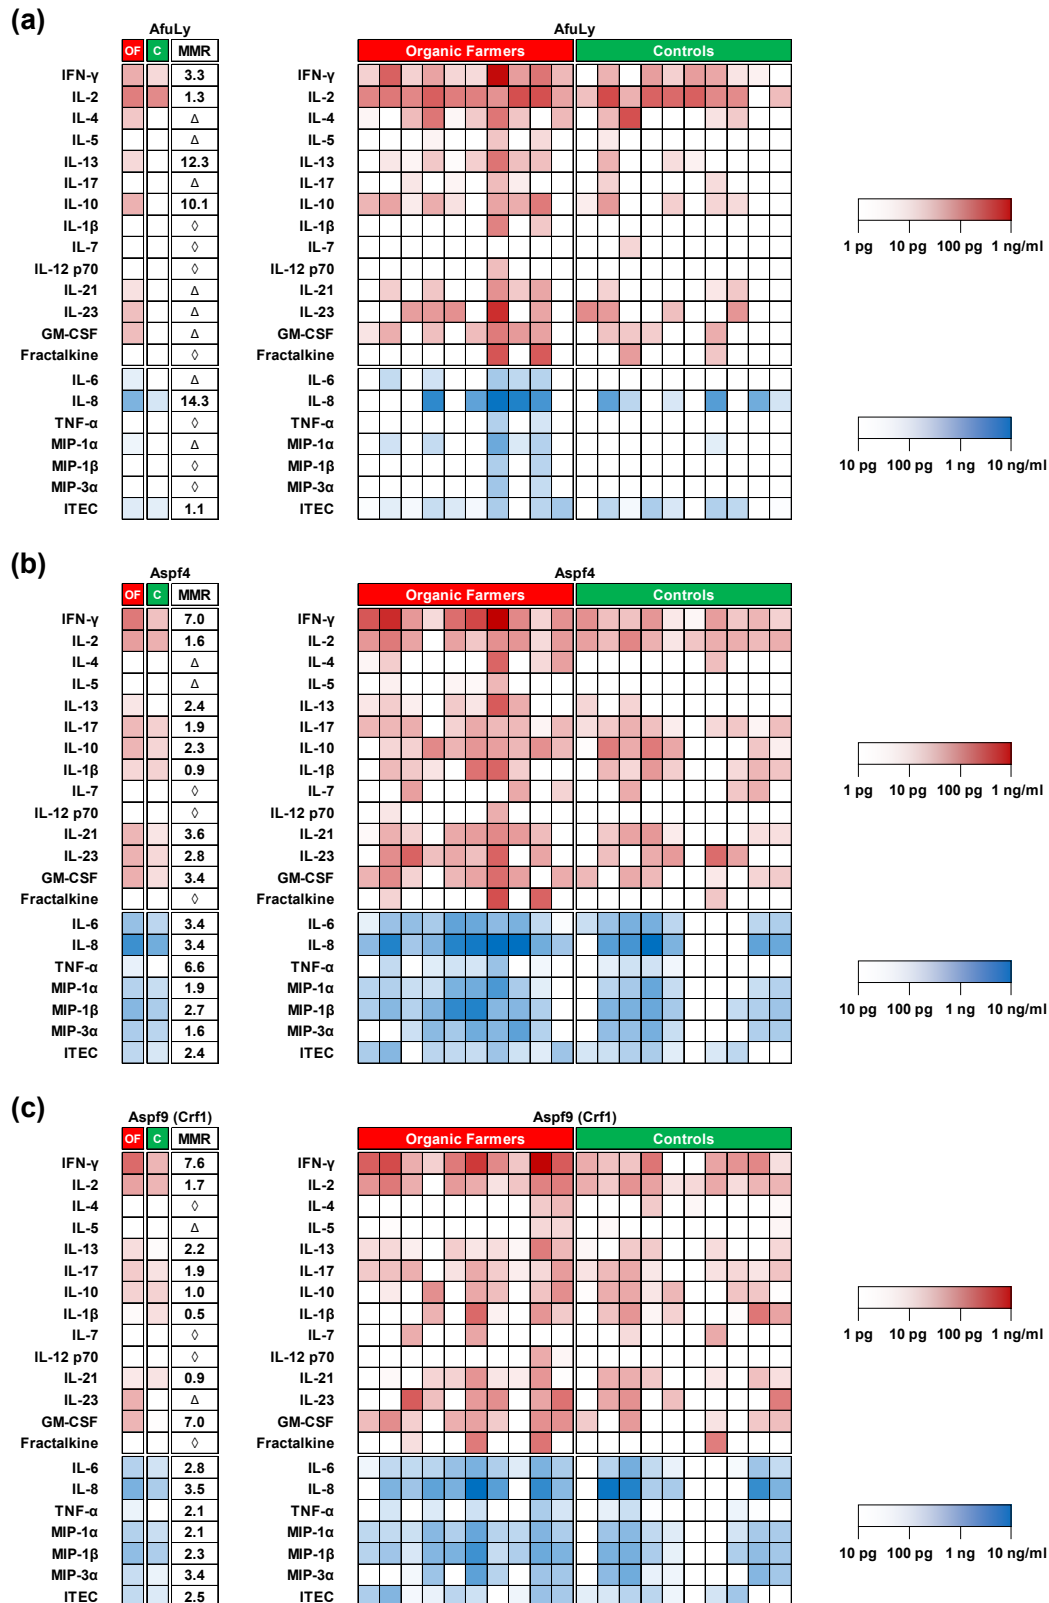

**Figure S3.** Heatmaps of median and individual cytokine responses (whole blood-based Luminex assay) to *A. fumigatus* antigens in samples from organic farmers and controls. The heatmaps summarize median and individual background-

adjusted cytokine concentrations in organic farmers (“OF”) and control subjects (“C”) depending on the *A. fumigatus* antigen used for stimulation. The numeric values in the MMR column represent median-to-median ratios between the two cohorts, with values >1.0 indicating greater median cytokine concentrations in the organic farmer cohort.  $\Delta$  denotes infinite median-to-median ratios (median = 0 pg/mL in the control cohort).  $\diamond$  denotes undefined median-to-median ratios (median = 0 pg/mL in both cohorts). AfuLy = *A. fumigatus* mycelial lysate.

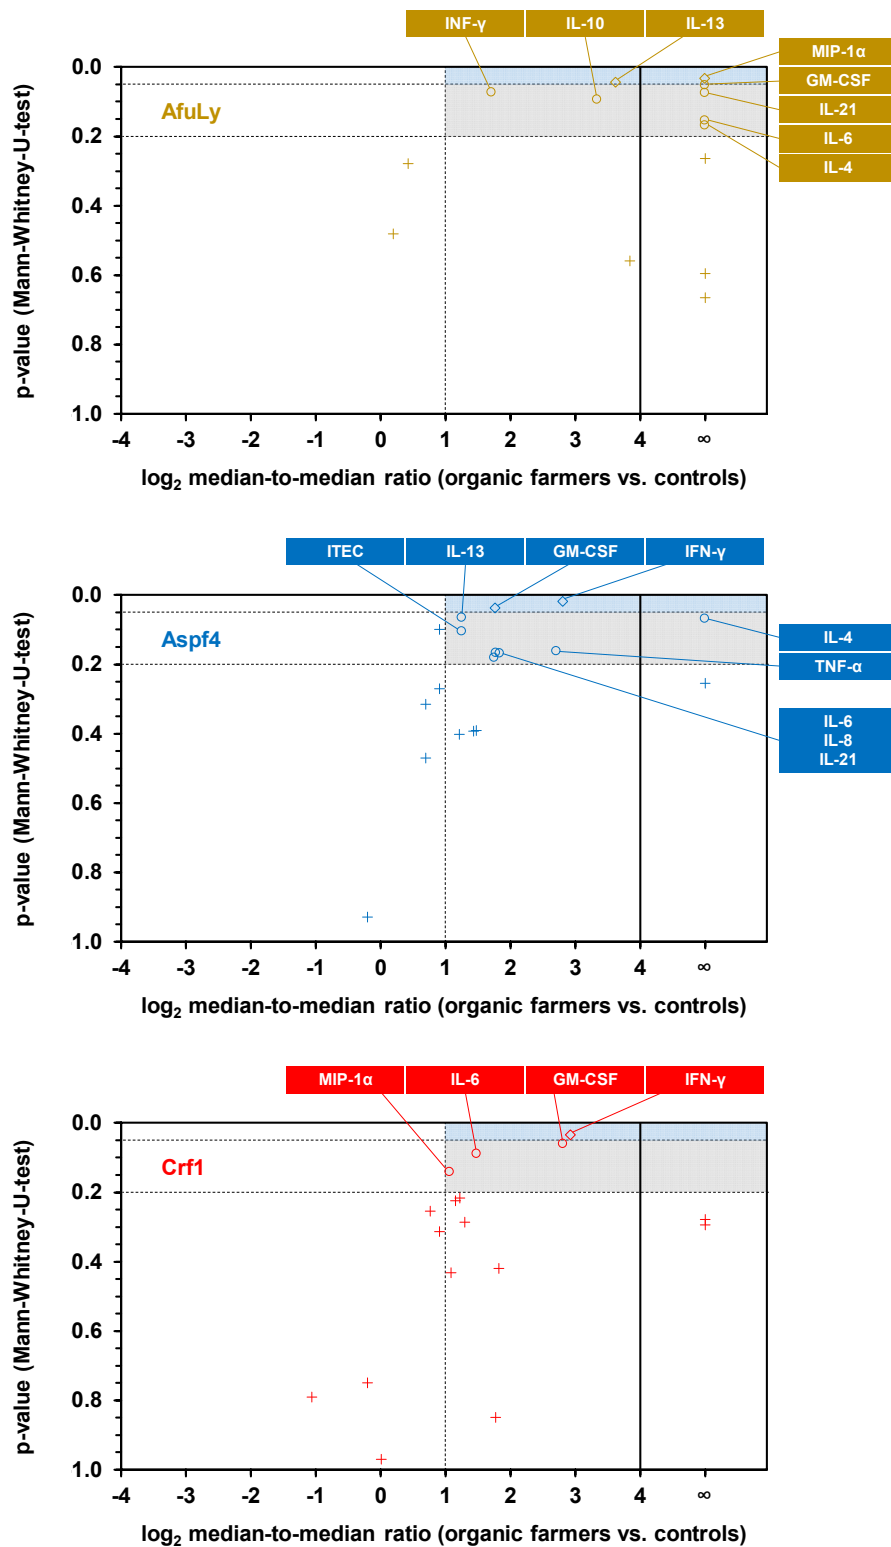

**Figure S4.** Volcano analysis of cytokine responses to *A. fumigatus* antigens identifies a selection of cytokine markers with significant or modest discriminatory power between organic farmers and controls. The volcano plots compare log<sub>2</sub>-transformed ratios of median concentrations for each antigen/cytokine combination in organic farmers and controls (x-values)

with the corresponding p-values (Mann-Whitney-U-test, y-values). Antigen/cytokine pairs are classified as insignificant ("+" symbols, median-to-median ratio < 2 and/or  $p > 0.2$ ), potentially significant (circles, median-to-median ratio > 2 and  $0.05 < p < 0.2$ ), or significant (diamonds, median-to-median ratio > 2 and  $p < 0.05$ ). Cytokine responses with medians of 0 pg/mL in both cohorts are not displayed.

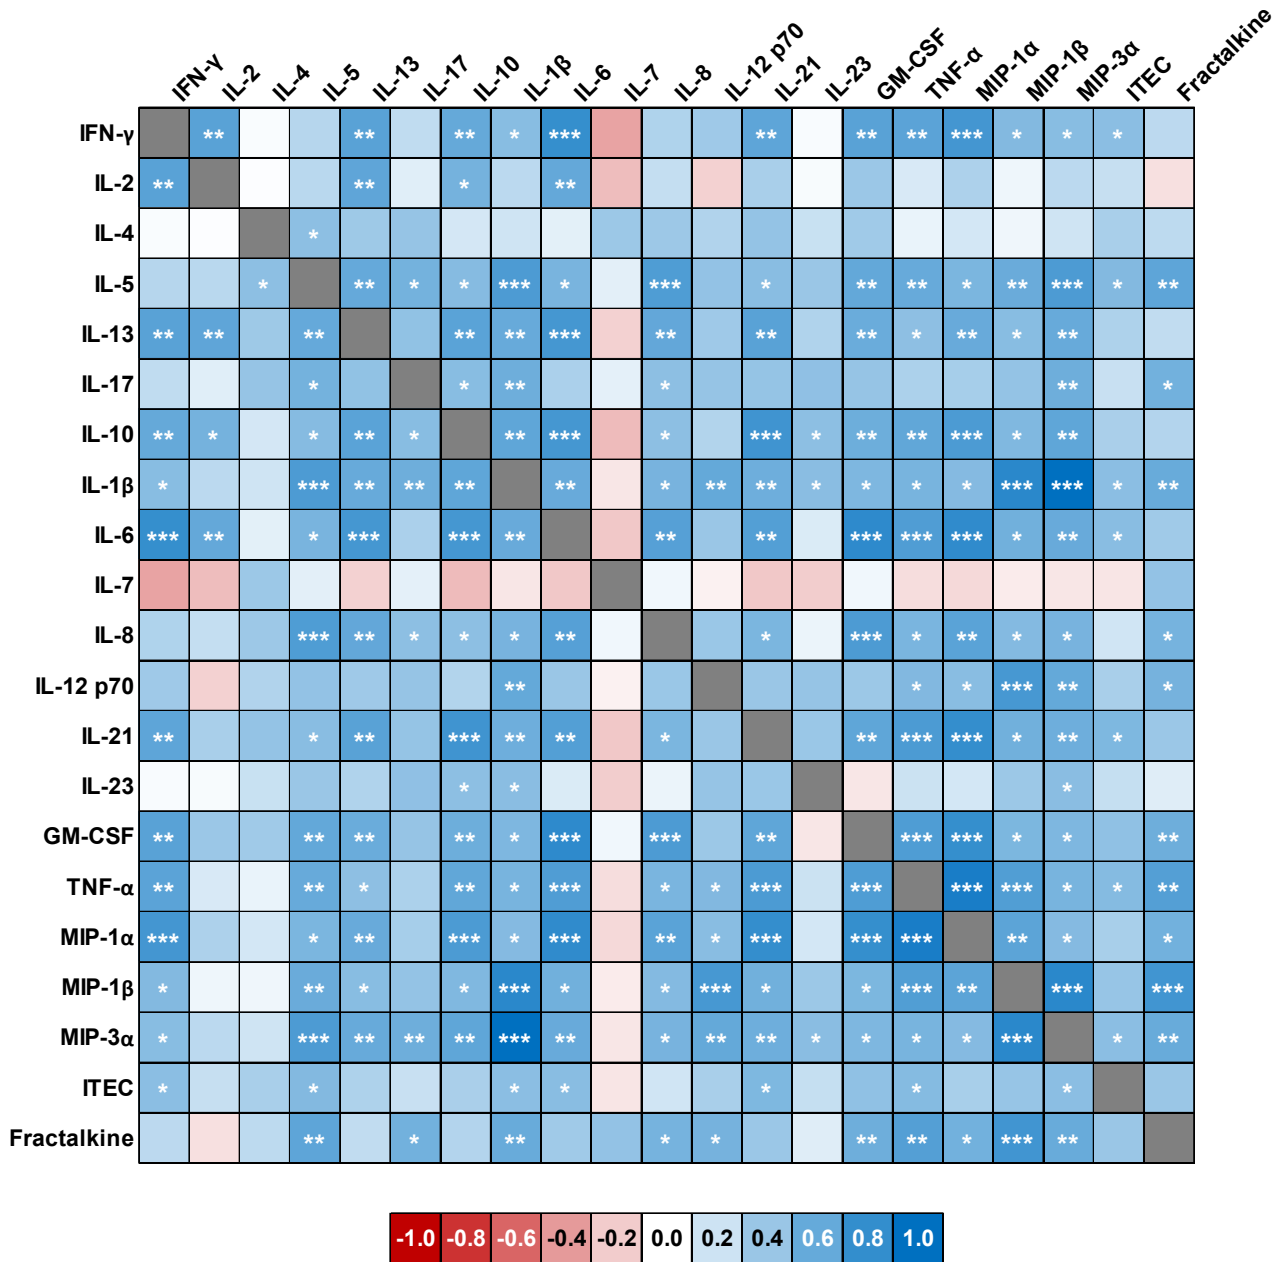

**Figure S5.** T-cellular and innate immune cell-derived cytokine responses to *A. fumigatus* antigens are strongly correlated in our cohort of organic farmers and controls. Heatmap of Spearman's rank correlation coefficients of individual cytokine concentrations elicited by *A. fumigatus* mycelial lysate (whole blood-based Luminex assay). FDR-corrected significance of Spearman coefficients is indicated by asterisks. \*  $p < 0.05$ , \*\*  $p < 0.01$ , \*\*\*  $p < 0.001$ .

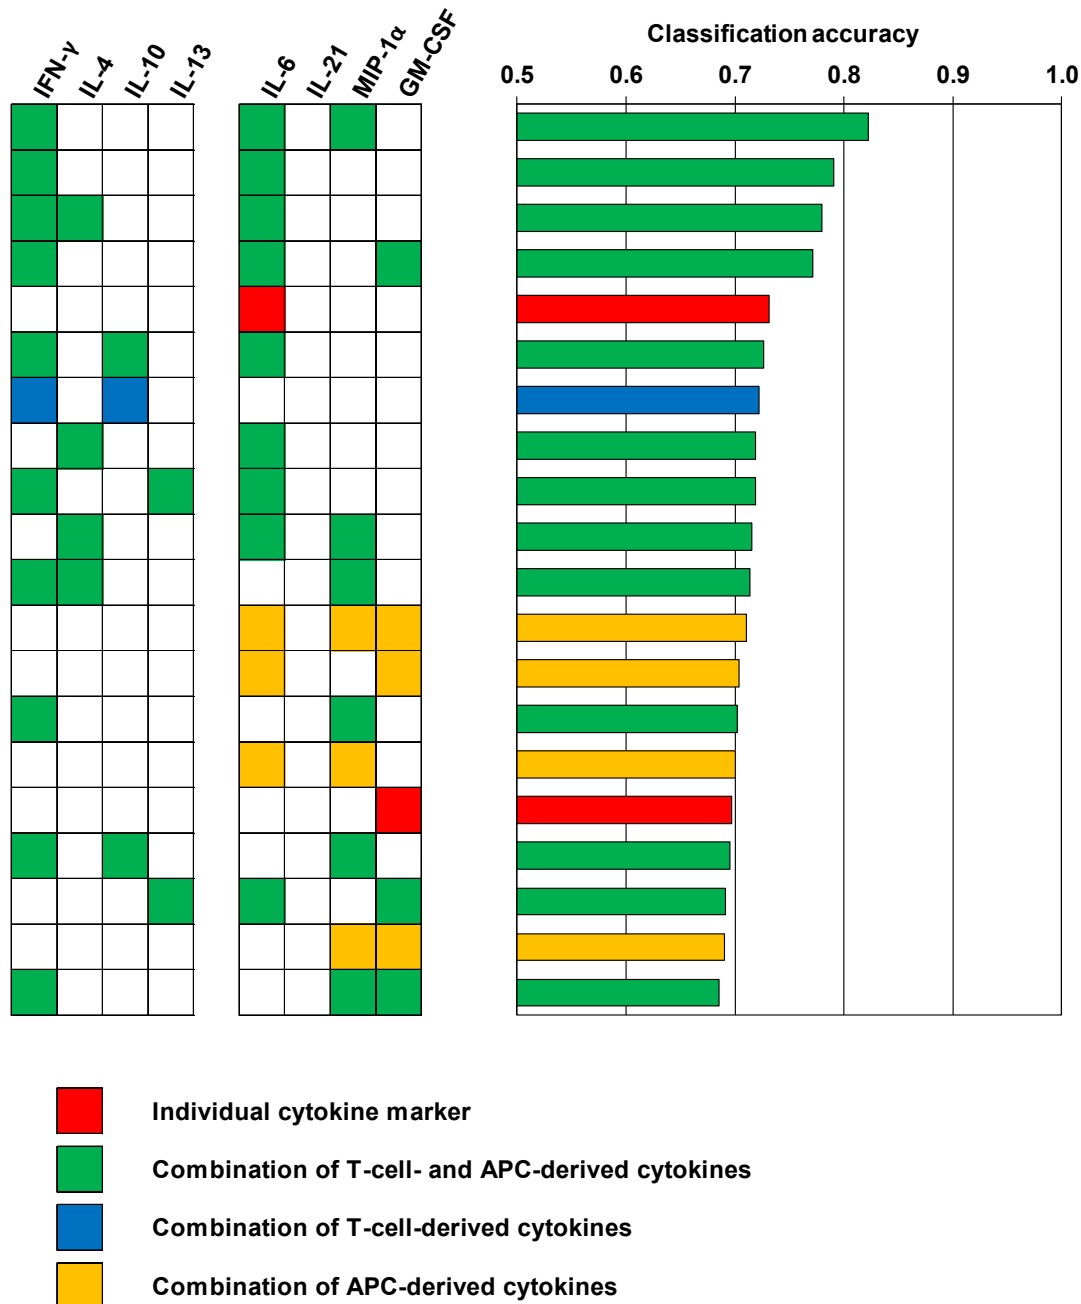

**Figure S6.** Cytokine concentrations detectable by whole blood-based Luminex analysis modestly differentiate immune responses of organic farmers and controls. The classification accuracy of combinations of up to 3 AfuLy-induced cytokines responses was determined by a random forest algorithm. The top 20 combinations with the highest classification accuracy between organic farmers and controls are shown. Only cytokine markers passing the pre-filtering step (Fig. S4) based on their relative induction in the two cohorts (median-to-median ratio > 2.0) and p-values ( $p < 0.2$ ) were considered. Abbreviations: AfuLy = *A. fumigatus* mycelial lysate, APC = antigen presenting cells.

**Table S1.** Oligonucleotides used for the generation of recombinant *A. fumigatus* proteins.

| Designation          | Systematic name | Localization         | Forward primer<br>Restriction sites are indicated by bold fonts.                         | Reverse primer<br>Restriction sites are indicated by bold fonts.   |
|----------------------|-----------------|----------------------|------------------------------------------------------------------------------------------|--------------------------------------------------------------------|
| Aspf1 (mitogillin)   | Afu5g02330      | secreted             | Aspf1-BamHI-FOR<br><b>GCAGGATCC</b> ACCTGGACATGCAT<br>CAAC                               | Aspf1-HindIII-REV<br>GCAA <b>AAGCTT</b> CTAATGAGAACACAG<br>TCT     |
| Aspf3                | Afu6g02280      | cytosolic            | Aspf3-BamHI-FOR<br><b>CTGGATCC</b> ATGTCTGGACTCAAG<br>GCCGGT                             | Aspf3-HindIII-REV<br>GCAA <b>AAGCTT</b> TTTACAGGTGCTTGAG<br>GACGGT |
| Aspf4                | Afu2g03830      | secreted             | Aspf4-BamHI-FOR<br><b>CAGGATCCC</b> ACGAGCGCCGCCAC<br>CTCCAC                             | Aspf4-HindIII-REV<br>GCAA <b>AAGCTT</b> CTACTCCTTGTAAGTCG<br>AGGTT |
| Aspf6 (MnSOD)        | Afu1g14550      | mitochondrial        | Aspf6-BamHI-FOR<br><b>AGGGTACC</b> ATGTACAGCAATAC<br>ACG                                 | Aspf6-HindIII-REV<br>GCAA <b>AAGCTT</b> CTACAGCTTCATGAA<br>TGG     |
| Aspf8                | Afu2g10100      | cytosolic            | Aspf8-BamHI-FOR<br><b>GCGGATCCT</b> CCTCTGAGGATGTCA<br>AGGCC                             | Aspf8-HindIII-REV<br>AGCA <b>AAGCTT</b> TTAGTCGAAAAGACC<br>GAAGCC  |
| Aspf9                | Afu1g16190      | secreted / cell wall | Aspf9-BamHI-FOR<br><b>CTGGATCCA</b> AGACCTGCCCCGCC<br>AACAAG                             | Aspf9-HindIII-REV<br>ACTA <b>AAGCTT</b> TTAGAAATGCCAACAC<br>GGCAG  |
| Aspf22 (enolase)     | Afu6g06770      | cytoplasm            | Eno-BamHI-FOR<br><b>CGGGATCC</b> ATGCCTATCTCCAAG<br>ATC                                  | Eno-PstI-REV<br>GCGCT <b>GCA</b> GTACAGGTTGACGGC<br>AGT            |
| CatB (catalase)      | Afu3g02270      | secreted / cell wall | Cat1-BamHI-FOR<br><b>CAGGATCCG</b> TATGTCCCTATATGA<br>CC                                 | Cat1-KpnI-REV<br>AGGGTACCCTCGATTGCATCGTGC<br>AA                    |
| CipC                 | Afu5g09330      | cytoplasm            | CipC-BamHI-FOR<br><b>CAGGATCC</b> ATGGCTTGGGGCTGG<br>GCAA <b>AAGCTT</b> TTTACCAACGGTCGAC | CipC-HindIII-REV<br>GCAA <b>AAGCTT</b> TTTACCAACGGTCGAC            |
| CsnB (chitosanase B) | Afu4g01290      | secreted             | CsnB-BamHI-FOR<br><b>TAGGATCCT</b> ATAATTTGCCCAACAGTAA <b>AAGCTT</b><br>AC               | CsnB-HindIII-REV<br>TAA <b>AAGCTT</b> CTATGCTTTCAAACCA<br>GC       |
| Hly (hemolysin)      | Afu3g00590      | secreted             | Hly-BamHI-FOR<br><b>CAGGATCC</b> ATGGCATCGGTCCAA<br>GCT                                  | Hly-KpnI-REV<br>AGGGTACCTCAGCGCTTCCTTCCA<br>AC                     |



|      |            |           |                          |                          |
|------|------------|-----------|--------------------------|--------------------------|
| Pst2 | Afu1g02820 | cytoplasm | Pst2-BamHI-FOR<br>AC     | Pst2-HindIII-REV<br>CTT  |
|      |            |           | CAGGATCCTACTCCATGTACGGCC | GCAAAGCTTTCACGCGAAGTTGAC |

Abbreviations: Aspf = *Aspergillus fumigatus* allergen, BamHI = *Bacillus amyloliquefaciens* restriction endonuclease HI, CipC = concanamycin-induced protein C, Eno = enolase, FOR = forward, HindIII = *Haemophilus influenzae* restriction endonuclease DIII, KpnI = *Klebsiella pneumoniae* restriction endonuclease I, MnSOD = manganese superoxide dismutase, PstI = *Providencia stuartii* restriction endonuclease I, Pst2 = oxidative stress response protein 2, REV = reverse.

**Table S2.** Preparation of stimulation tubes for whole blood stimulation. .

|                                                                                 | $\alpha$ -CD28 | $\alpha$ -CD49d | AfuLy          | Protein antigens | PHA           |
|---------------------------------------------------------------------------------|----------------|-----------------|----------------|------------------|---------------|
| <b>Concentration in the ready-to-use stimulation tube</b>                       | 2 $\mu$ g/mL   | 2 $\mu$ g/mL    | 100 $\mu$ g/mL | 60 $\mu$ g/mL    | 20 $\mu$ g/mL |
| <b>Final concentration after injection of 500 <math>\mu</math>L whole blood</b> | 1 $\mu$ g/mL   | 1 $\mu$ g/mL    | 50 $\mu$ g/mL  | 30 $\mu$ g/mL    | 10 $\mu$ g/mL |
| <b>Unstimulated background control</b>                                          | X              | X               |                |                  |               |
| <b>AfuLy stimulation</b>                                                        | X              | X               | X              |                  |               |
| <b><i>Aspergillus</i> protein stimulation</b>                                   | X              | X               |                | X                |               |
| <b>Positive control</b>                                                         |                |                 |                |                  | X             |

X indicates that the reagent was used for the respective stimulation mix. The volume of the stimulation mix in the ready-to-use tubes was adjusted to 500  $\mu$ L with RPMI 1640. Abbreviations:  $\alpha$  = anti, AfuLy = *Aspergillus fumigatus* mycelial lysate, CD = cluster of differentiation, PHA = phytohemagglutinin, RPMI = Roswell Park Memorial Institute.
